# Supplementary material
Source: Springer Nature journal article supplement (https://www.springermedizin.de/resource/supplementary/12887_2008_266_MOESM1_ESM.pdf/9477646)
Supplement: MOESM1 [file 9477646]

Titles identified through search strategy n= 6263

Excluded\* 5788

475 abstracts reviewed

Bibliographies, conference proceedings n=1

Excluded\* 447

29 studies for full text review

Excluded\* 17

12 relevant studies included
